# Supplementary material
Source: PubMed Central journal article supplement (PMC2917476)
Supplement: NIHMS201176-supplement-1.pdf [file NIHMS201176-supplement-1.pdf]

## Supplementary Information Titles

**Journal:** Nature Medicine

|                              |                                                                                                                           |
|------------------------------|---------------------------------------------------------------------------------------------------------------------------|
| <b>Article Title:</b>        | <b>A molecularly engineered split reporter for imaging protein-protein interactions with positron emission tomography</b> |
| <b>Corresponding Author:</b> | Sanjiv Sam Gambhir                                                                                                        |

| <b>Supplementary Item &amp; Number</b> | <b>Title or Caption</b>                                                              |
|----------------------------------------|--------------------------------------------------------------------------------------|
| Supplementary Methods                  | Supplementary Methods                                                                |
| Supplementary Discussion               | Supplementary Discussion                                                             |
| Supplementary Figure 1                 | Circular permutation strategy for TK                                                 |
| Supplementary Figure 2                 | Schematic representation of the plasmid vector constructs                            |
| Supplementary Figure 3                 | Schematic representation of the plasmid vector constructs                            |
| Supplementary Figure 4                 | Schematic representation of the single plasmid vector construct                      |
| Supplementary Figure 5                 | Fluorescence micrographs                                                             |
| Supplementary Figure 6                 | Ribbon diagram of the quaternary structure of the HSV1-TK homodimer                  |
| Supplementary Figure 7                 | Structure and circular permutation strategy for TK                                   |
| Supplementary Figure 8                 | Graph to show enzyme activity of five circularly permuted variants of TK             |
| Supplementary Figure 9                 | Graph to show comparison of coexpressed chimeras carrying nTK or cTK with FRB/FKBP12 |
| Supplementary Figure 10                | Graph to show time course of enzyme activity of a PCA using coexpressed chimeras     |
| Supplementary Figure 11                | Graph to show comparison of coexpressed chimeras                                     |
| Supplementary Figure 12                | Graph to show comparison of coexpressed chimeras                                     |

|                          |                                                                                                                                                                                                                                 |
|--------------------------|---------------------------------------------------------------------------------------------------------------------------------------------------------------------------------------------------------------------------------|
| Supplementary Figure 13  | Graph to show comparison of coexpressed chimeras                                                                                                                                                                                |
| Supplementary Figure 14  | Expression levels of FRB (mTOR) and FKBP12                                                                                                                                                                                      |
| Supplementary Figure 15  | The uncut version of the Western blot showing expression levels of FKBP12                                                                                                                                                       |
| Supplementary Figure 16  | Graph to show in vitro response of 293T cells stably transfected with pcDNA-pUbi-FKBP12-cTK-pCMV-nTK <sub>(V119C)</sub> -FRB after 36 h exposure to escalating doses of rapamycin,                                              |
| Supplementary Figure 17  | Graph to show in vitro response of 293T cells stably transfected with pcDNA-pUbi-FKBP12-cTK-pCMV-nTK <sub>(V119C)</sub> -FRB after 36 h exposure to escalating doses of ascomycin (FK506) along with a fixed 40 nM of rapamycin |
| Supplementary Figure 18  | Graph to show reversibility of the split TK-based PCA using a ligand-reversible dimer of a mutant FKBP12 called F <sub>M</sub> (F36M)                                                                                           |
| Supplementary Figure 19  | Graph to show reversibility of the split TK-based PCA using a ligand-reversible dimer of a mutant FKBP12 called F <sub>M</sub> (F36M) that can be disrupted by FK506                                                            |
| Supplementary Table 1    | Supplementary Table 1                                                                                                                                                                                                           |
| Supplementary Table 2    | Supplementary Table 2                                                                                                                                                                                                           |
| Supplementary References | Supplementary References                                                                                                                                                                                                        |
